# Supplementary material
Source: HighWire-hosted journal article supplement (http://www.qdcxjkg.com/highwire/filestream/112622/field_highwire_adjunct_files/0/ERJ_8_2197.pdf)
Supplement: ERJ_8_2197.pdf [file ERJ_8_2197.pdf]

## CORRIGENDUM

"Anti-tuberculosis medication and the liver: danger and recommendations in management".  
N.P.Thompson, M.E. Caplin, M.I. Hamilton, S.H. Gillespie, S.W. Clarke, A.K. Burroughs,  
N. McIntyre. *Eur Respir J* 1995, 8, 1384–1388.

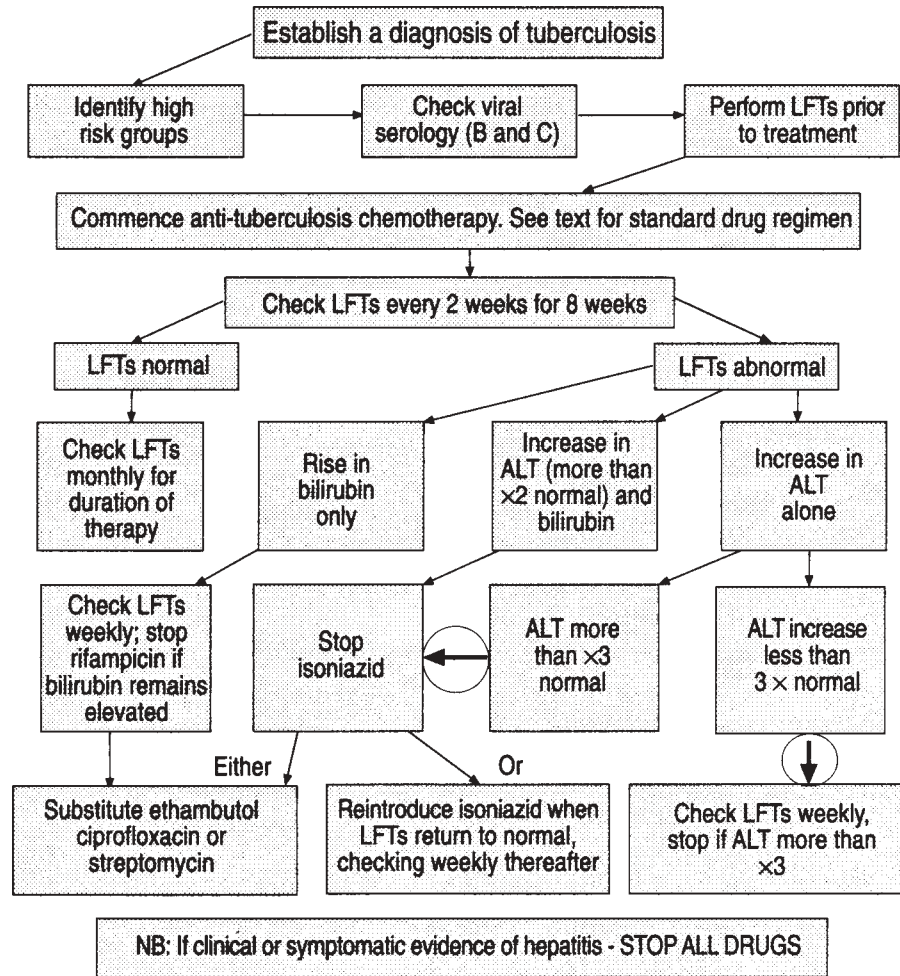

Fig. 1. – Protocol for anti-tuberculosis drugs and possible hepatotoxicity. LFTs: liver function tests; ALT: L-alanine aminotransferase.

In figure 1, two arrows were inadvertently omitted. These arrows have now been placed in bold and encircled in the above figure.

Please note an error in dosage on p. 1386; 20  $\mu\text{g}\cdot\text{kg}^{-1}$  should read 20  $\text{mg}\cdot\text{kg}^{-1}$ .
